# Supplementary material for: CRISPR 2 PCR and high resolution melting profiling for identification and characterization of clinically-relevant Salmonella enterica subsp. enterica
Source: PeerJ. 2020 Jun 16;8:e9113. doi: 10.7717/peerj.9113 (PMC7304428; doi:10.7717/peerj.9113)
Supplement: Supplemental Information 1 [file peerj-08-9113-s001.xlsx]

## Sheet: ERIC Fingerprint
Salmonella Isolate name and Standard Salmonella Serotypes			M	411	412	443	466	475	482	483	454	378	S. Monophasic	S. Stanley	S. Enteritidis	M				393	402	450	487	S. Enteritidis	454	378	S. Weltevreden	S. Derby	ND.	S. Agona	ND.	M
