# Supplementary material for: CRISPR 2 PCR and high resolution melting profiling for identification and characterization of clinically-relevant Salmonella enterica subsp. enterica
Source: PeerJ. 2020 Jun 16;8:e9113. doi: 10.7717/peerj.9113 (PMC7304428; doi:10.7717/peerj.9113)
Supplement: Supplemental Information 2 [file peerj-08-9113-s002.xlsx]

## Sheet: HRM Typing
Clinical Salmonella isolates from 64 hospitalized patients at Phayao Ram hospital, Phayao Thailand during April 2015 to July 2017
NO	ID	Patient information			Hospitalized Date			Place	Sample types	Phenotype Characterization			Molecular Characterization		Salmonella Typing
		Age	m/y	Gender	Date	Month	Year			Apicillin Resistance	Cefotaxime Resistance	ESBL Phenotype	BlaTEM like	Bla CTX M like	HRM Method	Standard method
1	1	9	m	f	9	April	2015	Phayao Ram hospital	stool	R			y		4,5,12:i:-	4,5,12:i:-
2	3	8	m	m	24	May	2015	Phayao Ram hospital	stool	R			y		Stanley	Stanley
3	4	1	y	f	24	May	2015	Phayao Ram hospital	stool	R			y		-*	Derby
4	5	3	y	m	24	May	2015	Phayao Ram hospital	stool						-	Weltevreden
5	9	1	y	m	16	May	2015	Phayao Ram hospital	stool	R			y		4,5,12:i:-	4,5,12:i:-
6	10	2	y	m	16	May	2015	Phayao Ram hospital	stool						Newport	Newport
7	23	11	m	f	16	May	2015	Phayao Ram hospital	stool	R			y		4,5,12:i:-	4,5,12:i:-
8	24	6	y	f	23	May	2015	Phayao Ram hospital	stool	R			y		Stanley	Stanley
9	25	3	y	m	24	May	2015	Phayao Ram hospital	stool	R			y		4,5,12:i:-	4,5,12:i:-
10	32	10	m	m	6	June	2015	Phayao Ram hospital	stool						9,12:-:1,5	9,12:-:1,5
11	35	1	y	m	21	June	2015	Phayao Ram hospital	stool	R			y		4,5,12:i:-	4,5,12:i:-
12	36	92	y	f	21	June	2015	Phayao Ram hospital	stool	R			TEM 1		Stanley	Stanley
13	38	1	y	m	21	June	2015	Phayao Ram hospital	stool						Montevideo	Montevideo
14	49	7	y	m	22	July	2015	Phayao Ram hospital	stool						Enteritidis	Enteritidis
15	52	9	m	f	5	July	2015	Phayao Ram hospital	stool						-	Corvallis
16	56	11	m	f	20	July	2015	Phayao Ram hospital	stool	R			y		4,5,12:i:-	4,5,12:i:-
17	76	2	y	f	20	July	2015	Phayao Ram hospital	stool	R	R	ESBL	y	CTX 15	4,5,12:i:-	4,5,12:i:-
18	112	1	y	f	7	August	2015	Phayao Ram hospital	stool	R			y		Stanley	Stanley
19	125	8	y	m	25	October	2015	Phayao Ram hospital	stool						Give	Give
20	131	1	y	f	20	September	2015	Phayao Ram hospital	stool	R			y		Stanley	Stanley
21	132	1	y	m	20	September	2015	Phayao Ram hospital	stool	R			y		Stanley	Stanley
22	133	1	y	f	20	September	2015	Phayao Ram hospital	stool						-	Kentucky
23	134	9	m	f	20	September	2015	Phayao Ram hospital	stool						Yoruba	Yoruba
24	142	1	y	f	19	November	2015	Phayao Ram hospital	stool	R			y		4,5,12:i:-	4,5,12:i:-
25	145	4	m	f	11	November	2015	Phayao Ram hospital	stool						-	Weltevreden
26	148	3	y	f	11	November	2015	Phayao Ram hospital	stool	R			y		Stanley	Stanley
27	152	10	m	f	11	November	2015	Phayao Ram hospital	stool	R	R	ESBL	y	y	4,5,12:i:-	4,5,12:i:-
28	157	1	y	f	24	Decembe	2015	Phayao Ram hospital	stool	R	R	ESBL	y	CTX 15	4,5,12:i:-	4,5,12:i:-
29	161	1	y	m	24	Decembe	2015	Phayao Ram hospital	stool						Stanley	Stanley
30	166	7	m	f	31	Decembe	2015	Phayao Ram hospital	stool						Newport	Newport
31	172	3	y	m	9	January	2016	Phayao Ram hospital	stool	R	R	ESBL	TEM 1	y	4,5,12:i:-	4,5,12:i:-
32	246	5	m	m	18	Febuary	2016	Phayao Ram hospital	stool						Bareilly	Bareilly
33	249	1	y	m	17	March	2016	Phayao Ram hospital	stool	R	R	ESBL	TEM 1	y	4,12:i:-	4,12:i:-
34	253	1	y	m	18	March	2016	Phayao Ram hospital	stool						-	Weltevreden
35	254	1	y	m	18	March	2016	Phayao Ram hospital	stool	R			TEM 1		-	Kedougou
36	262	7	m	f	28	May	2016	Phayao Ram hospital	stool						-	Weltevreden
37	269	4	m	f	28	May	2016	Phayao Ram hospital	stool						-	Weltevreden
38	298	8	m	f	25	May	2016	Phayao Ram hospital	stool	R			TEM 1		Stanley	Stanley
39	312	9	m	f	24	May	2016	Phayao Ram hospital	stool						Stanley	ND
40	316	7	m	m	24	May	2016	Phayao Ram hospital	stool	R			y		4,5,12:i:-	ND
41	345	7	m	m	4	September	2016	Phayao Ram hospital	stool	R			y		4,5,12:i:-	ND
42	350	1	y	f	27	September	2016	Phayao Ram hospital	stool	R			y		4,5,12:i:-	ND
43	378	10	m	m	24	October	2016	Phayao Ram hospital	stool				y		ND	ND
44	392	10	m	m	25	November	2016	Phayao Ram hospital	stool	R			y		4,5,12:i:-	ND
45	393	10	m	m	25	November	2016	Phayao Ram hospital	stool				y		Enteritidis	ND
46	394	10	m	m	25	November	2016	Phayao Ram hospital	stool	R			y		4,5,12:i:-	ND
47	402	9	m	m	5	December	2016	Phayao Ram hospital	stool	R			y		Enteritidis	ND
48	411	11	m	m	15	January	2017	Phayao Ram hospital	stool	R	R	ESBL	y	y	ND	ND
49	412	1	y	f	15	January	2017	Phayao Ram hospital	stool	R	R	ESBL	y	y	ND*	ND
50	413	1	y	f	15	January	2017	Phayao Ram hospital	stool	R			y		Stanley	ND
51	443	4	y	m	18	Febuary	2017	Phayao Ram hospital	stool	R			y		ND	ND
52	444	1	y	f	18	Febuary	2017	Phayao Ram hospital	stool	R			y		4,5,12:i:-	ND
53	450	6	y	f	31	March	2017	Phayao Ram hospital	stool						Enteritidis	ND
54	454	2	y	m	28	April	2017	Phayao Ram hospital	stool						ND	ND
55	458	6	y	m	5	June	2017	Phayao Ram hospital	stool	R			y		4,5,12:i:-	ND
56	466	1	y	m	25	May	2017	Phayao Ram hospital	stool	R			y		ND	ND
57	474	1	y	m	3	June	2017	Phayao Ram hospital	stool	R			y		4,5,12:i:-	ND
58	475	8	m	m	5	June	2017	Phayao Ram hospital	stool	R			y		ND	ND
59	482	1	y	f	13	June	2017	Phayao Ram hospital	stool				y		ND	ND
60	483	8	y	f	17	June	2017	Phayao Ram hospital	stool						ND	ND
61	484	1	y	f	7	June	2017	Phayao Ram hospital	stool	R			y		4,5,12:i:-	ND
62	487	1	y	f	23	June	2017	Phayao Ram hospital	stool						Enteritidis	ND
63	495	1	y	m	27	June	2017	Phayao Ram hospital	stool						Stanley	ND
64	497	2	y	m	1	July	2017	Phayao Ram hospital	stool	R			y		4,5,12:i:-	ND
ID, Identified name; ESBL, Extened Spectrum Beta Lactemase; R, Resistance; y, positive; * Identified by ERIC PCR as S.4,5,12:i:-

## Sheet: CRISPR 2
CRISPR 2 HRM PCR									CRISPR 2 Sequencing and analyzation
No	ID	Source	Year	ESBL	Locality	Specimen	Salmonella Typing
							HRM Typing	Conventional Serotyping
1	316	Hospitalized patient	2016		Phayao Ram hospital	stool	Monophasic	ND
2	345	Hospitalized patient	2016		Phayao Ram hospital	stool	Monophasic	ND
3	350	Hospitalized patient	2016		Phayao Ram hospital	stool	Monophasic	ND
4	392	Hospitalized patient	2016		Phayao Ram hospital	stool	Monophasic	ND
5	393	Hospitalized patient	2016		Phayao Ram hospital	stool	Enteritidis	ND
6	394	Hospitalized patient	2016		Phayao Ram hospital	stool	Monophasic	ND
7	402	Hospitalized patient	2016		Phayao Ram hospital	stool	Enteritidis	ND
8	412	Hospitalized patient	2016	ESBL	Phayao Ram hospital	stool	ND	ND
9	444	Hospitalized patient	2017		Phayao Ram hospital	stool	Monophasic	ND
10	450	Hospitalized patient	2017		Phayao Ram hospital	stool	Enteritidis	ND
11	458	Hospitalized patient	2017		Phayao Ram hospital	stool	Monophasic	ND
12	474	Hospitalized patient	2017		Phayao Ram hospital	stool	Monophasic	ND
13	484	Hospitalized patient	2017		Phayao Ram hospital	stool	Monophasic	ND
14	487	Hospitalized patient	2017		Phayao Ram hospital	stool	Enteritidis	ND
15	497	Hospitalized patient	2017		Phayao Ram hospital	stool	Monophasic	ND
16	1 (M1)	Hospitalized patient	2015		Phayao Ram hospital	stool	Monophasic	Monophasic	Yes
17	23 (M23)	Hospitalized patient	2015		Phayao Ram hospital	stool	Monophasic	Monophasic
18	25 (M25)	Hospitalized patient	2015		Phayao Ram hospital	stool	Monophasic	Monophasic	Yes
19	56 (M56)	Hospitalized patient	2015		Phayao Ram hospital	stool	Monophasic	Monophasic	Yes
20	76 (M76)	Hospitalized patient	2015	ESBL	Phayao Ram hospital	stool	Monophasic	Monophasic	Yes
21	142 (M142)	Hospitalized patient	2015		Phayao Ram hospital	stool	Monophasic	Monophasic
22	152 (M152)	Hospitalized patient	2015	ESBL	Phayao Ram hospital	stool	Monophasic	Monophasic	Yes
23	157 (M157)	Hospitalized patient	2015	ESBL	Phayao Ram hospital	stool	Monophasic	Monophasic	Yes
24	249 (M249)	Hospitalized patient	2016	ESBL	Phayao Ram hospital	stool	Monophasic	Monophasic	Yes
25	En11	Raw food	2017		Nan*	Minced pork	Monophasic	Monophasic
26	En21	Raw food	2017		Phayao*	Minced pork	Monophasic	Monophasic
27	En26	Raw food	2017		Phayao*	Minced pork	Monophasic	Monophasic
28	En29	Raw food	2017		Phare*	Minced pork	Monophasic	Monophasic
29	En8	Raw food	2017		Phayao*	Minced pork	Monophasic	Monophasic
30	En28	Raw food	2017		Phare*	Minced pork	Typhimurium	Typhimurium
31	En23	Raw food	2017		Phayao*	Minced pork	Typhimurium	Typhimurium
32	En16	Raw food	2017		Chaiang Mai*	Minced pork	Typhimurium	Typhimurium
33	En13	Raw food	2017		Chaiang Mai*	Minced pork	Typhimurium	Typhimurium
34	En12	Raw food	2017	ESBL	Nan*	Minced pork	Typhimurium	Typhimurium
35	En6	Raw food	2017		Phayao*	Minced pork	Typhimurium	Typhimurium
* Provinces in northen Thailand

## Sheet: M1
CRISPR 2 Sequence analysation of M1 Salmonela isolate
Raw sequence
TGTAGCTGCCATTACTGGTACACAGATTATGATTATGCAACGGCTATCCTTGTTGGCGCGGGGAACACATCTTCATATTG
CGTGACGCTGCCGATGAACGCGGTTTATCCCCGCTGGCGCGGGGAACACTCTTTATCAGCTAACCATTTCCAGAACTCGT
CCGGTTTATCCCTGCTGGCGCGGGGAACACTATAATATGAATTAATTTTTGCGCATAACCTGCGGTTTATCCCCGCTGGC
GCGGGGAACACTGCCCGTTCTGCCTCTTCGCACTCTCGATCAACGGTTTATCCCCGCTGGCGCGGGGAACACTGCGTAAT
GGGCTACCTGAACTTCACATATCCCGGTTTATCCCCGCTAGCGCGGGGAACATATTAAGCGCGCAAAGTTTGGGTTAATT
GGACACGGTTTATCCCCGCTGGCGCGGGGAACACCGTATTCGTCACACAGCCCCGTCCAGAAATGACGGTTTATCCCCGC
TGGCACGGGGAACACTAACGAACTGAATAAAATGTCAGAAAGTGACGCGGCTTATCCCCGCTGGCGCGGGGAACACGCAG
CTTAGCGACGAAATTAAAACCGAACTCACCGGTTTATCCCCGCTGGCGCGGGGAACACTGCCAGTGACTACAGAAGCGTC
GCTATCGGGGCGGTTTATCCCCGCTGGCGCGGGGAACACCCGATAAACAACCGCATAGCCTCTTTCGTTTCGATTTATCC
CTGCTGGCGCGGGGAACACTGCTCAATAACGTCGTAAATAGCGTAAGCTGGCGGTTTAT
DR Consensus			CGGTTTATCCCCGCTGGCGCGGGGAACAC
DR Length			29
Spacers Count			9
Direction			-
Potential Orientation (AT%)			ND
Evidence Level			4
Conservation DR			0.9191
Conservation Spacer			0
Spacer
>spacer1
TCTTTATCAGCTAACCATTTCCAGAACTCGTC
>spacer2
TATAATATGAATTAATTTTTGCGCATAACCTG
>spacer3
TGCCCGTTCTGCCTCTTCGCACTCTCGATCAA
>spacer4
TGCGTAATGGGCTACCTGAACTTCACATATCC
>spacer5
ATTAAGCGCGCAAAGTTTGGGTTAATTGGACA
>spacer6
CGTATTCGTCACACAGCCCCGTCCAGAAATGA
>spacer7
TAACGAACTGAATAAAATGTCAGAAAGTGACG
>spacer8
GCAGCTTAGCGACGAAATTAAAACCGAACTCAC
>spacer9
TGCCAGTGACTACAGAAGCGTCGCTATCGGGG
GGAACACACCGATAAACAACCGCATAGCCTCTTTCGTTTCGATTTATCCCTGCTGGCGCGGGGAACACTGCTCAATAACG
TCGTAAATAGCGTAAGCTGGCGGTTTATCCCCGCTGGCGCGGGGAACACTATTTCGCCTTCGGCACTGACGTCACCGTCA
ACGGTTTATCCCCGCTGGCGCGGGGAACACGTCGCGTTCGTTGCCGGTATAGACCAGCGTCACGGTTTATCCCCGCTGGC
GCGGGGAACACATCGAATCGAAACCCCAGCCACAGAAATAATTCGGTTTATCCCCGCTGGCGCGGGGAACACGCTCATGT
CAAACGCCATCAGCGTTCCGGCATCGGTTTATCCCCGCTAGCGCGGGGAACACAATCGCCAGCCTCGGAAATATTCCATC
CTCCGCGGTTTATCCCCGCTGGCGCGGGGAACACAGGAACTAAACAGCCTGACCGTTGAGGATCTGCGGTTTATCCCCGC
TGGCGCGGGGAACACACCGGACAAATCTTTTTTTTCCTGTTCCTGTTCGGTTTATCCCCGCTGGCGCGGGGAACACGGGC
GGTCCCCGGCCTCAATACCGCGCTGACGCGGTTTATCCCCGCTGGCGCGGGGAACACTTGAGGTGCCGCTTGCCGTTCTT
CTGTTTTTTCGGTTTATCCCCGCTGGCGCGGGGAACACGGGCACTATGAACGGATCGGCGCTGATGCCGGCGGTTTATCC
CCGCTGGCGCGGGGAACACGGTAAAGCCACACCATTTTTTATTGACCTCGCCGGTTTATCCCCGCTGGCGCGGGGAACAC
CTAGGAGGCGTAATGAATACTACGTATCAAAACGGTTTATCCCCGCTGGCGCGGGGAACACACTAAACGGATATAATTGT
TTATAAACTACTTTTTGTCAGCACCACATTCTACCAACATAATCGCAACAATTTAAATTATTAAAGAACAGCTAATTTGC
T
DR Consensus			CGGTTTATCCCCGCTGGCGCGGGGAACAC
DR Length			29
Spacers Count			12
Direction			-
Potential Orientation (AT%)			-
Evidence Level			4
Conservation DR			0.9865
Conservation Spacer			0
Spacer
>spacer1
TATTTCGCCTTCGGCACTGACGTCACCGTCAA
>spacer2
GTCGCGTTCGTTGCCGGTATAGACCAGCGTCA
>spacer3
ATCGAATCGAAACCCCAGCCACAGAAATAATT
>spacer4
GCTCATGTCAAACGCCATCAGCGTTCCGGCAT
>spacer5
AATCGCCAGCCTCGGAAATATTCCATCCTCCG
>spacer6
AGGAACTAAACAGCCTGACCGTTGAGGATCTG
>spacer7
ACCGGACAAATCTTTTTTTTCCTGTTCCTGTT
>spacer8
GGGCGGTCCCCGGCCTCAATACCGCGCTGACG
>spacer9
TTGAGGTGCCGCTTGCCGTTCTTCTGTTTTTT
>spacer10
GGGCACTATGAACGGATCGGCGCTGATGCCGG
>spacer11
GGTAAAGCCACACCATTTTTTATTGACCTCGC
>spacer12
CTAGGAGGCGTAATGAATACTACGTATCAAAA

## Sheet: M25
CRISPR 2 Sequence analysation of M25 Salmonela isolate
Raw sequence
CATGGCCTTCTCCTGTCTAAAAGCCTCCCCGGGAAAACGCGGCCTTTTTACTTTACAGGTTTGTAGCTGCCATTACTGGT
ACACAGATTATGATTATGCAACGGCTATCCTTGTTGGCGCGGGGAACACATCTTCATATTGCGTGACGCTGCCGATGAAC
GCGGTTTATCCCCGCTGGCGCGGGGAACACTCTTTATCAGCTAACCATTTCCAGAACTCGTCCGGTTTATCCCTGCTGGC
GCGGGGAACACTATAATATGAATTAATTTTTGCGCATAACCTGCGGTTTATCCCCGCTGGCGCGGGGAACACTGCCCGTT
CTGCCTCTTCGCACTCTCGATCAACGGTTTATCCCCGCTGGCGCGGGGAACACTGCGTAATGGGCTACCTGAACTTCACA
TATCCCGGTTTATCCCCGCTAGCGCGGGGAACATATTAAGCGCGCAAAGTTTGGGTTAATTGGACACGGTTTATCCCCGC
TGGCGCGGGGAACACCGTATTCGTCACACAGCCCCGTCCAGAAATGACGGTTTATCCCCGCTGGCACGGGGAACACTAAC
GAACTGAATAAAATGTCAGAAAGTGACGCGGCTTATCCCCGCTGGCGCGGGGAACACGCAGCTTAGCGACGAAATTAAAA
CCGAACTCACCGGTTTATCCCCGCTGGCGCGGGGAACACTGCCAGTGACTACAGAAGCGTCGCTATCGGGGCGGTTTATC
CCCGCTGGCGCGGGGAACACACCGATAAACAACCGCATAGCCTCTTTCGTTTCGATTTATCCCTGCTGGCGCGGGGAACA
CTGCTCAATAACGTCGTAAATAGCGTAAGCTGGCGGTTTATCCCCGCTGGCGCGGGGAACACTATTTCGCCTTCGGCACT
GACGTCACCGTCAACGGTTTATCCCCGCTGGCGCGGGGAACACGTCGCGTTCGTTGCCGGTATAGACCAGCGTCACGGTT
TATCCCCGCTGGCGCGGGGAACACATCGAATCGAAACCCCAGCCACAGAAATAATTCGGTTTATCCCCGCTGGCGCGGGG
AACACGCTCATGTCAAACGCCATCAGCGTTCCGGCATCGGTTTATCCCCGCTAGCGCGGGGAACACAATCGCCAGCCTCG
GAAATATTCCATCCTCCGCGGTTTATCCCCGCTGGCGCGGGGAACACAGGAACTAAACAGCCTGACCGTTGAGGATCTGC
GGTTTATCCCCGCTGGCGCGGGGAACACACCGGACAAATCTTTTTTTTCCTGTTCCTGTTCGGTTTATCCCCGCTGGCGC
GGGGAACACGGGCGGTCCCCGGCCTCAATACCGCGCTGACGCGGTTTATCCCCGCTGGCGCGGGGAACACTTGAGGTGCC
GCTTGCCGTTCTTCTGTTTTTTCGGTTTATCCCCGCTGGCGCGGGGAACACGGGCACTATGAACGGATCGGCGCTGATGC
CGGCGGTTTATCCCCGCTGGCGCGGGGAACACGGTAAAGCCACACCATTTTTTATTGACCTCGCCGGTTTATCCCCGCTG
GCGCGGGGAACACCTAGGAGGCGTAATGAATACTACGTATCAAAACGGTTTATCCCCGCTGGCGCGGGGAACACACTAAA
CGGATATAATTGTTTATAAACTACTTTTTGTCAGCACCACATTCTACCAACATAATCGCAACAATTTAAATTATTAAAGA
ACAGCTAATTTGCT
DR Consensus			CGGTTTATCCCCGCTGGCGCGGGGAACAC
DR Length			29
Spacers Count			24
Direction			-
Potential Orientation (AT%)			ND
Evidence Level			4
Conservation DR			0.8844
Conservation Spacer			0
Spacer
>spacer1
ATCTTCATATTGCGTGACGCTGCCGATGAACG
>spacer2
TCTTTATCAGCTAACCATTTCCAGAACTCGTC
>spacer3
TATAATATGAATTAATTTTTGCGCATAACCTG
>spacer4
TGCCCGTTCTGCCTCTTCGCACTCTCGATCAA
>spacer5
TGCGTAATGGGCTACCTGAACTTCACATATCC
>spacer6
ATTAAGCGCGCAAAGTTTGGGTTAATTGGACA
>spacer7
CGTATTCGTCACACAGCCCCGTCCAGAAATGA
>spacer8
TAACGAACTGAATAAAATGTCAGAAAGTGACG
>spacer9
GCAGCTTAGCGACGAAATTAAAACCGAACTCAC
>spacer10
TGCCAGTGACTACAGAAGCGTCGCTATCGGGG
>spacer11
ACCGATAAACAACCGCATAGCCTCTTTCGTTT
>spacer12
TGCTCAATAACGTCGTAAATAGCGTAAGCTGG
>spacer13
TATTTCGCCTTCGGCACTGACGTCACCGTCAA
>spacer14
GTCGCGTTCGTTGCCGGTATAGACCAGCGTCA
>spacer15
ATCGAATCGAAACCCCAGCCACAGAAATAATT
>spacer16
GCTCATGTCAAACGCCATCAGCGTTCCGGCAT
>spacer17
AATCGCCAGCCTCGGAAATATTCCATCCTCCG
>spacer18
AGGAACTAAACAGCCTGACCGTTGAGGATCTG
>spacer19
ACCGGACAAATCTTTTTTTTCCTGTTCCTGTT
>spacer20
GGGCGGTCCCCGGCCTCAATACCGCGCTGACG
>spacer21
TTGAGGTGCCGCTTGCCGTTCTTCTGTTTTTT
>spacer22
GGGCACTATGAACGGATCGGCGCTGATGCCGG
>spacer23
GGTAAAGCCACACCATTTTTTATTGACCTCGC
>spacer24
CTAGGAGGCGTAATGAATACTACGTATCAAAA

## Sheet: M56
CRISPR 2 Sequence analysation of M56 Salmonela isolate
Raw sequence
CATGGCCTTCTCCTGTCTAAAAGCCTCCCCGGGAAAACGCGGCCTTTTTACTTTACAGGTTTGTAGCTGCCATTACTGGT
ACACAGATTATGATTATGCAACGGCTATCCTTGTTGGCGCGGGGAACACATCTTCATATTGCGTGACGCTGCCGATGAAC
GCGGTTTATCCCCGCTGGCGCGGGGAACACTCTTTATCAGCTAACCATTTCCAGAACTCGTCCGGTTTATCCCTGCTGGC
GCGGGGAACACTATAATATGAATTAATTTTTGCGCATAACCTGCGGTTTATCCCCGCTGGCGCGGGGAACACTGCCCGTT
CTGCCTCTTCGCACTCTCGATCAACGGTTTATCCCCGCTGGCGCGGGGAACACTGCGTAATGGGCTACCTGAACTTCACA
TATCCCGGTTTATCCCCGCTAGCGCGGGGAACATATTAAGCGCGCAAAGTTTGGGTTAATTGGACACGGTTTATCCCCGC
TGGCGCGGGGAACACCGTATTCGTCACACAGCCCCGTCCAGAAATGACGGTTTATCCCCGCTGGCACGGGGAACACTAAC
GAACTGAATAAAATGTCAGAAAGTGACGCGGCTTATCCCCGCTGGCGCGGGGAACACGCAGCTTAGCGACGAAATTAAAA
CCGAACTCACCGGTTTATCCCCGCTGGCGCGGGGAACACTGCCAGTGACTACAGAAGCGTCGCTATCGGGGCGGTTTATC
CCCGCTGGCGCGGGGAACACACCGATAAACAACCGCATAGCCTCTTTCGTTTCGATTTATCCCTGCTGGCGCGGGGAACA
CTGCTCAATAACGTCGTAAATAGCGTAAGCTGGCGGTTTATCCCCGCTGGCGCGGGGAACACTATTTCGCCTTCGGCACT
GACGTCACCGTCAACGGTTTATCCCCGCTGGCGCGGGGAACACGTCGCGTTCGTTGCCGGTATAGACCAGCGTCACGGTT
TATCCCCGCTGGCGCGGGGAACACATCGAATCGAAACCCCAGCCACAGAAATAATTCGGTTTATCCCCGCTGGCGCGGGG
AACACGCTCATGTCAAACGCCATCAGCGTTCCGGCATCGGTTTATCCCCGCTAGCGCGGGGAACACAATCGCCAGCCTCG
GAAATATTCCATCCTCCGCGGTTTATCCCCGCTGGCGCGGGGAACACAGGAACTAAACAGCCTGACCGTTGAGGATCTGC
GGTTTATCCCCGCTGGCGCGGGGAACACACCGGACAAATCTTTTTTTTCCTGTTCCTGTTCGGTTTATCCCCGCTGGCGC
GGGGAACACGGGCGGTCCCCGGCCTCAATACCGCGCTGACGCGGTTTATCCCCGCTGGCGCGGGGAACACTTGAGGTGCC
GCTTGCCGTTCTTCTGTTTTTTCGGTTTATCCCCGCTGGCGCGGGGAACACGGGCACTATGAACGGATCGGCGCTGATGC
CGGCGGTTTATCCCCGCTGGCGCGGGGAACACGGTAAAGCCACACCATTTTTTATTGACCTCGCCGGTTTATCCCCGCTG
GCGCGGGGAACACCTAGGAGGCGTAATGAATACTACGTATCAAAACGGTTTATCCCCGCTGGCGCGGGGAACACACTAAA
CGGATATAATTGTTTATAAACTACTTTTTGTCAGCACCACATTCTACCAACATAATCGCAACAATTTAAATTATTAAAGA
ACAGCTAATTTGCT
DR Consensus			CGGTTTATCCCCGCTGGCGCGGGGAACAC
DR Length			29
Spacers Count			24
Direction			-
Potential Orientation (AT%)			-
Evidence Level			4
Conservation DR			0.8844
Conservation Spacer			0
Spacer
>spacer1
ATCTTCATATTGCGTGACGCTGCCGATGAACG
>spacer2
TCTTTATCAGCTAACCATTTCCAGAACTCGTC
>spacer3
TATAATATGAATTAATTTTTGCGCATAACCTG
>spacer4
TGCCCGTTCTGCCTCTTCGCACTCTCGATCAA
>spacer5
TGCGTAATGGGCTACCTGAACTTCACATATCC
>spacer6
ATTAAGCGCGCAAAGTTTGGGTTAATTGGACA
>spacer7
CGTATTCGTCACACAGCCCCGTCCAGAAATGA
>spacer8
TAACGAACTGAATAAAATGTCAGAAAGTGACG
>spacer9
GCAGCTTAGCGACGAAATTAAAACCGAACTCAC
>spacer10
TGCCAGTGACTACAGAAGCGTCGCTATCGGGG
>spacer11
ACCGATAAACAACCGCATAGCCTCTTTCGTTT
>spacer12
TGCTCAATAACGTCGTAAATAGCGTAAGCTGG
>spacer13
TATTTCGCCTTCGGCACTGACGTCACCGTCAA
>spacer14
GTCGCGTTCGTTGCCGGTATAGACCAGCGTCA
>spacer15
ATCGAATCGAAACCCCAGCCACAGAAATAATT
>spacer16
GCTCATGTCAAACGCCATCAGCGTTCCGGCAT
>spacer17
AATCGCCAGCCTCGGAAATATTCCATCCTCCG
>spacer18
AGGAACTAAACAGCCTGACCGTTGAGGATCTG
>spacer19
ACCGGACAAATCTTTTTTTTCCTGTTCCTGTT
>spacer20
GGGCGGTCCCCGGCCTCAATACCGCGCTGACG
>spacer21
TTGAGGTGCCGCTTGCCGTTCTTCTGTTTTTT
>spacer22
GGGCACTATGAACGGATCGGCGCTGATGCCGG
>spacer23
GGTAAAGCCACACCATTTTTTATTGACCTCGC
>spacer24
CTAGGAGGCGTAATGAATACTACGTATCAAAA

## Sheet: M76
CRISPR 2 Sequence analysation of M76 Salmonela isolate
Raw sequence
CATGGCCTTCTCCTGTCTAAAAGCCTCCCCGGGAAAACGCGGCCTTTTTACTTTACAGGTTTGTAGCTGCCATTACTGGT
ACACAGATTATGATTATGCAACGGCTATCCTTGTTGGCGCGGGGAACACATCTTCATATTGCGTGACGCTGCCGATGAAC
GCGGTTTATCCCCGCTGGCGCGGGGAACACTCTTTATCAGCTAACCATTTCCAGAACTCGTCCGGTTTATCCCTGCTGGC
GCGGGGAACACTATAATATGAATTAATTTTTGCGCATAACCTGCGGTTTATCCCCGCTGGCGCGGGGAACACTGCCCGTT
CTGCCTCTTCGCACTCTCGATCAACGGTTTATCCCCGCTGGCGCGGGGAACACTGCGTAATGGGCTACCTGAACTTCACA
TATCCCGGTTTATCCCCGCTAGCGCGGGGAACATATTAAGCGCGCAAAGTTTGGGTTAATTGGACACGGTTTATCCCCGC
TGGCGCGGGGAACACCGTATTCGTCACACAGCCCCGTCCAGAAATGACGGTTTATCCCCGCTGGCACGGGGAACACTAAC
GAACTGAATAAAATGTCAGAAAGTGACGCGGCTTATCCCCGCTGGCGCGGGGAACACGCAGCTTAGCGACGAAATTAAAA
CCGAACTCACCGGTTTATCCCCGCTGGCGCGGGGAACACTGCCAGTGACTACAGAAGCGTCGCTATCGGGGCGGTTTATC
CCCGCTGGCGCGGGGAACACACCGATAAACAACCGCATAGCCTCTTTCGTTTCGATTTATCCCTGCTGGCGCGGGGAACA
CTGCTCAATAACGTCGTAAATAGCGTAAGCTGGCGGTTTATCCCCGCTGGCGCGGGGAACACTATTTCGCCTTCGGCACT
GACGTCACCGTCAACGGTTTATCCCCGCTGGCGCGGGGAACACGTCGCGTTCGTTGCCGGTATAGACCAGCGTCACGGTT
TATCCCCGCTGGCGCGGGGAACACATCGAATCGAAACCCCAGCCACAGAAATAATTCGGTTTATCCCCGCTGGCGCGGGG
AACACGCTCATGTCAAACGCCATCAGCGTTCCGGCATCGGTTTATCCCCGCTAGCGCGGGGAACACAATCGCCAGCCTCG
GAAATATTCCATCCTCCGCGGTTTATCCCCGCTGGCGCGGGGAACACAGGAACTAAACAGCCTGACCGTTGAGGATCTGC
GGTTTATCCCCGCTGGCGCGGGGAACACACCGGACAAATCTTTTTTTTCCTGTTCCTGTTCGGTTTATCCCCGCTGGCGC
GGGGAACACGGGCGGTCCCCGGCCTCAATACCGCGCTGACGCGGTTTATCCCCGCTGGCGCGGGGAACACTTGAGGTGCC
GCTTGCCGTTCTTCTGTTTTTTCGGTTTATCCCCGCTGGCGCGGGGAACACGGGCACTATGAACGGATCGGCGCTGATGC
CGGCGGTTTATCCCCGCTGGCGCGGGGAACACGGTAAAGCCACACCATTTTTTATTGACCTCGCCGGTTTATCCCCGCTG
GCGCGGGGAACACCTAGGAGGCGTAATGAATACTACGTATCAAAACGGTTTATCCCCGCTGGCGCGGGGAACACACTAAA
CGGATATAATTGTTTATAAACTACTTTTTGTCAGCACCACATTCTACCAACATAATCGCAACAATTTAAATTATTAAAGA
ACAGCTAATTTGCT
DR Consensus			CGGTTTATCCCCGCTGGCGCGGGGAACAC
DR Length			29
Spacers Count			24
Direction			-
Potential Orientation (AT%)			-
Evidence Level			4
Conservation DR			0.8844
Conservation Spacer			0
Spacer
>spacer1
ATCTTCATATTGCGTGACGCTGCCGATGAACG
>spacer2
TCTTTATCAGCTAACCATTTCCAGAACTCGTC
>spacer3
TATAATATGAATTAATTTTTGCGCATAACCTG
>spacer4
TGCCCGTTCTGCCTCTTCGCACTCTCGATCAA
>spacer5
TGCGTAATGGGCTACCTGAACTTCACATATCC
>spacer6
ATTAAGCGCGCAAAGTTTGGGTTAATTGGACA
>spacer7
CGTATTCGTCACACAGCCCCGTCCAGAAATGA
>spacer8
TAACGAACTGAATAAAATGTCAGAAAGTGACG
>spacer9
GCAGCTTAGCGACGAAATTAAAACCGAACTCAC
>spacer10
TGCCAGTGACTACAGAAGCGTCGCTATCGGGG
>spacer11
ACCGATAAACAACCGCATAGCCTCTTTCGTTT
>spacer12
TGCTCAATAACGTCGTAAATAGCGTAAGCTGG
>spacer13
TATTTCGCCTTCGGCACTGACGTCACCGTCAA
>spacer14
GTCGCGTTCGTTGCCGGTATAGACCAGCGTCA
>spacer15
ATCGAATCGAAACCCCAGCCACAGAAATAATT
>spacer16
GCTCATGTCAAACGCCATCAGCGTTCCGGCAT
>spacer17
AATCGCCAGCCTCGGAAATATTCCATCCTCCG
>spacer18
AGGAACTAAACAGCCTGACCGTTGAGGATCTG
>spacer19
ACCGGACAAATCTTTTTTTTCCTGTTCCTGTT
>spacer20
GGGCGGTCCCCGGCCTCAATACCGCGCTGACG
>spacer21
TTGAGGTGCCGCTTGCCGTTCTTCTGTTTTTT
>spacer22
GGGCACTATGAACGGATCGGCGCTGATGCCGG
>spacer23
GGTAAAGCCACACCATTTTTTATTGACCTCGC
>spacer24
CTAGGAGGCGTAATGAATACTACGTATCAAAA

## Sheet: M152
CRISPR 2 Sequence analysation of M152 Salmonela isolate
Raw sequence
AGCAAATTAGCTGTTCTTTAATAATTTAAATTGTTGCGATTATGTTGGTAGAATGTGGTGCTGACAAAAAGTAGTTTATA
AACAATTATATCCGTTTAGTGTGTTCCCCGCGCCAGCGGGGATAAACCGTTTTGATACGTAGTATTCATTACGCCTCCTA
GGTGTTCCCCGCGCCAGCGGGGATAAACCGGCGAGGTCAATAAAAAATGGTGTGGCTTTACCGTGTTCCCCGCGCCAGCG
GGGATAAACCGCCGGCATCAGCGCCGATCCGTTCATAGTGCCCGTGTTCCCCGCGCCAGCGGGGATAAACCGAAAAAACA
GAAGAACGGCAAGCGGCACCTCAAGTGTTCCCCGCGCCAGCGGGGATAAACCGCGTCAGCGCGGTATTGAGGCCGGGGAC
CGCCCGTGTTCCCCGCGCCAGCGGGGATAAACCGAACAGGAACAGGAAAAAAAAGATTTGTCCGGTGTGTTCCCCGCGCC
AGCGGGGATAAACCGCAGATCCTCAACGGTCAGGCTGTTTAGTTCCTGTGTTCCCCGCGCCAGCGGGGATAAACCGCGGA
GGATGGAATATTTCCGAGGCTGGCGATTGTGTTCCCCGCGCTAGCGGGGATAAACCGATGCCGGAACGCTGATGGCGTTT
GACATGAGCGTGTTCCCCGCGCCAGCGGGGATAAACCGAATTATTTCTGTGGCTGGGGTTTCGATTCGATGTGTTCCCCG
CGCCAGCGGGGATAAACCGTGACGCTGGTCTATACCGGCAACGAACGCGACGTGTTCCCCGCGCCAGCGGGGATAAACCG
TTGACGGTGACGTCAGTGCCGAAGGCGAAATAGTGTTCCCCGCGCCAGCGGGGATAAACCGCCAGCTTACGCTATTTACG
ACGTTATTGAGCAGTGTTCCCCGCGCCAGCAGGGATAAATCGAAACGAAAGAGGCTATGCGGTTGTTTATCGGTGTGTTC
CCCGCGCCAGCGGGGATAAACCGCCCCGATAGCGACGCTTCTGTAGTCACTGGCAGTGTTCCCCGCGCCAGCGGGGATAA
ACCGGTGAGTTCGGTTTTAATTTCGTCGCTAAGCTGCGTGTTCCCCGCGCCAGCGGGGATAAGCCGCGTCACTTTCTGAC
ATTTTATTCAGTTCGTTAGTGTTCCCCGTGCCAGCGGGGATAAACCGTCATTTCTGGACGGGGCTGTGTGACGAATACGG
TGTTCCCCGCGCCAGCGGGGATAAACCGTGTCCAATTAACCCAAACTTTGCGCGCTTAATATGTTCCCCGCGCTAGCGGG
GATAAACCGGGATATGTGAAGTTCAGGTAGCCCATTACGCAGTGTTCCCCGCGCCAGCGGGGATAAACCGTTGATCGAGA
GTGCGAAGAGGCAGAACGGGCAGTGTTCCCCGCGCCAGCGGGGATAAACCGCAGGTTATGCGCAAAAATTAATTCATATT
ATAGTGTTCCCCGCGCCAGCAGGGATAAACCGGACGAGTTCTGGAAATGGTTAGCTGATAAAGAGTGTTCCCCGCGCCAG
CGGGGATAAACCGCGTTCATCGGCAGCGTCACGCAATATGAAGATGTGTTCCCCGCGCCAACAAGGATAGCCGTTGCATA
ATCATAATCTGTGTACCAGTAATGGCAGCTACAAACCTGTAAAGTAAAAAGGCCGCGTTTTCCCGGGGAGGCTTTTAGAC
AGGAGAAGGCCATG
DR Consensus			GTGTTCCCCGCGCCAGCGGGGATAAACCG
DR Length			29
Spacers Count			21
Direction			-
Potential Orientation (AT%)			-
Evidence Level			4
Conservation DR			0.8844
Conservation Spacer			0
Spacer
>spacer1
CCCACCGCGCTGATTAACGACGGACTGTTACA
>spacer2
TGAGCAACGACAGTAAATAATTTTTCGTGCTG
>spacer3
AACCGCTGGCGGGCTGATTGGTCTGCAACCAC
>spacer4
CAACCAGGCTGGATCGTAACTCCTATCCCCTC
>spacer5
AAAATGCAGGTGGGGTAACGAATGCGAGATTG
>spacer6
CCATTATTCAACCCTCCAGGCTCGCGCCGGCT
>spacer7
CCAGTGGGCGTAGCCAGCTCATCGCTATTTTGC
>spacer8
CGTTGCGGATTATCGTTAAGACTGAAGGAAGT
>spacer9
CGTCACTACCGAGACCGAGACCGAGACCGAGA
>spacer10
CCGCTGACGCACTGGATCAACCTGACGCAACG
>spacer11
TTGCAGGGCGATATTGTTGTTGGTGAATGGGA
>spacer12
CGTCGCGGAAAATTTCGCATTGACGATAAAGA
>spacer13
TTACGTGTTTATTCATCTGTTGCATTAGATTC
>spacer14
GAGGCGTACAGGCTGTTAGATGAGAAATTACC
>spacer15
ACGCCCCGAATGTGTTTGCCTCGCCCGCTGCC
>spacer16
ACGCCCCGAATGTGTTTGCCTCGCCCGCTGCC
>spacer17
TGGATTATCTGTATTTTACGGAAGTGGGCGCG
>spacer18
GTCGTTCATCAGGCACTACCGGCACTTTCTGG
>spacer19
ATATTCGCCGCTTTCCATTTACCGAACGTAAC
>spacer20
CCACGTTCGGCGATGTTGGCCCCATCGGTCCA
>spacer21
AAACGGTAGTGTTTTAAAACCGTTTCGAGGTGC

## Sheet: M157
CRISPR 2 Sequence analysation of M157 Salmonela isolate
Raw sequence
AGCAAATTAGCTGTTCTTTAATAATTTAAATTGTTGCGATTATGTTGGTAGAATGTGGTGCTGACAAAAAGTAGTTTATA
AACAATTATATCCGTTTAGTGTGTTCCCCGCGCCAGCGGGGATAAACCGTTTTGATACGTAGTATTCATTACGCCTCCTA
GGTGTTCCCCGCGCCAGCGGGGATAAACCGGCGAGGTCAATAAAAAATGGTGTGGCTTTACCGTGTTCCCCGCGCCAGCG
GGGATAAACCGCCGGCATCAGCGCCGATCCGTTCATAGTGCCCGTGTTCCCCGCGCCAGCGGGGATAAACCGAAAAAACA
GAAGAACGGCAAGCGGCACCTCAAGTGTTCCCCGCGCCAGCGGGGATAAACCGCGTCAGCGCGGTATTGAGGCCGGGGAC
CGCCCGTGTTCCCCGCGCCAGCGGGGATAAACCGAACAGGAACAGGAAAAAAAAGATTTGTCCGGTGTGTTCCCCGCGCC
AGCGGGGATAAACCGCAGATCCTCAACGGTCAGGCTGTTTAGTTCCTGTGTTCCCCGCGCCAGCGGGGATAAACCGCGGA
GGATGGAATATTTCCGAGGCTGGCGATTGTGTTCCCCGCGCTAGCGGGGATAAACCGATGCCGGAACGCTGATGGCGTTT
GACATGAGCGTGTTCCCCGCGCCAGCGGGGATAAACCGAATTATTTCTGTGGCTGGGGTTTCGATTCGATGTGTTCCCCG
CGCCAGCGGGGATAAACCGTGACGCTGGTCTATACCGGCAACGAACGCGACGTGTTCCCCGCGCCAGCGGGGATAAACCG
TTGACGGTGACGTCAGTGCCGAAGGCGAAATAGTGTTCCCCGCGCCAGCGGGGATAAACCGCCAGCTTACGCTATTTACG
ACGTTATTGAGCAGTGTTCCCCGCGCCAGCAGGGATAAATCGAAACGAAAGAGGCTATGCGGTTGTTTATCGGTGTGTTC
CCCGCGCCAGCGGGGATAAACCGCCCCGATAGCGACGCTTCTGTAGTCACTGGCAGTGTTCCCCGCGCCAGCGGGGATAA
ACCGGTGAGTTCGGTTTTAATTTCGTCGCTAAGCTGCGTGTTCCCCGCGCCAGCGGGGATAAGCCGCGTCACTTTCTGAC
ATTTTATTCAGTTCGTTAGTGTTCCCCGTGCCAGCGGGGATAAACCGTCATTTCTGGACGGGGCTGTGTGACGAATACGG
TGTTCCCCGCGCCAGCGGGGATAAACCGTGTCCAATTAACCCAAACTTTGCGCGCTTAATATGTTCCCCGCGCTAGCGGG
GATAAACCGGGATATGTGAAGTTCAGGTAGCCCATTACGCAGTGTTCCCCGCGCCAGCGGGGATAAACCGTTGATCGAGA
GTGCGAAGAGGCAGAACGGGCAGTGTTCCCCGCGCCAGCGGGGATAAACCGCAGGTTATGCGCAAAAATTAATTCATATT
ATAGTGTTCCCCGCGCCAGCAGGGATAAACCGGACGAGTTCTGGAAATGGTTAGCTGATAAAGAGTGTTCCCCGCGCCAG
CGGGGATAAACCGCGTTCATCGGCAGCGTCACGCAATATGAAGATGTGTTCCCCGCGCCAACAAGGATAGCCGTTGCATA
ATCATAATCTGTGTACCAGTAATGGCAGCTACAAACCTGTAAAGTAAAAAGGCCGCGTTTTCCCGGGGAGGCTTTTAGAC
AGGAGAAGGCCATG
DR Consensus			CGGTTTATCCCCGCTGGCGCGGGGAACAC
DR Length			29
Spacers Count			24
Direction			+
Potential Orientation (AT%)			+
Evidence Level			4
Conservation DR			0.8844
Conservation Spacer			0
Spacer
>spacer1
TTTTGATACGTAGTATTCATTACGCCTCCTAG
>spacer2
GCGAGGTCAATAAAAAATGGTGTGGCTTTACC
>spacer3
CCGGCATCAGCGCCGATCCGTTCATAGTGCCC
>spacer4
AAAAAACAGAAGAACGGCAAGCGGCACCTCAA
>spacer5
CGTCAGCGCGGTATTGAGGCCGGGGACCGCCC
>spacer6
AACAGGAACAGGAAAAAAAAGATTTGTCCGGT
>spacer7
CAGATCCTCAACGGTCAGGCTGTTTAGTTCCT
>spacer8
CGGAGGATGGAATATTTCCGAGGCTGGCGATT
>spacer9
ATGCCGGAACGCTGATGGCGTTTGACATGAGC
>spacer10
AATTATTTCTGTGGCTGGGGTTTCGATTCGAT
>spacer11
TGACGCTGGTCTATACCGGCAACGAACGCGAC
>spacer12
TTGACGGTGACGTCAGTGCCGAAGGCGAAATA
>spacer13
CCAGCTTACGCTATTTACGACGTTATTGAGCA
>spacer14
AAACGAAAGAGGCTATGCGGTTGTTTATCGGT
>spacer15
CCCCGATAGCGACGCTTCTGTAGTCACTGGCA
>spacer16
GTGAGTTCGGTTTTAATTTCGTCGCTAAGCTGC
>spacer17
CGTCACTTTCTGACATTTTATTCAGTTCGTTA
>spacer18
TCATTTCTGGACGGGGCTGTGTGACGAATACG
>spacer19
TGTCCAATTAACCCAAACTTTGCGCGCTTAAT
>spacer20
GGATATGTGAAGTTCAGGTAGCCCATTACGCA
>spacer21
TTGATCGAGAGTGCGAAGAGGCAGAACGGGCA
>spacer22
CAGGTTATGCGCAAAAATTAATTCATATTATA
>spacer23
GACGAGTTCTGGAAATGGTTAGCTGATAAAGA
>spacer24
CGTTCATCGGCAGCGTCACGCAATATGAAGAT

## Sheet: M249
CRISPR 2 Sequence analysation of M249 Salmonela isolate
Raw sequence
AGCAAATTAGCTGTTCTTTAATAATTTAAATTGTTGCGATTATGTTGGTAGAATGTGGTGCTGACAAAAAGTAGTTTATA
AACAATTATATCCGTTTAGTGTGTTCCCCGCGCCAGCGGGGATAAACCGTTTTGATACGTAGTATTCATTACGCCTCCTA
GGTGTTCCCCGCGCCAGCGGGGATAAACCGGCGAGGTCAATAAAAAATGGTGTGGCTTTACCGTGTTCCCCGCGCCAGCG
GGGATAAACCGCCGGCATCAGCGCCGATCCGTTCATAGTGCCCGTGTTCCCCGCGCCAGCGGGGATAAACCGAAAAAACA
GAAGAACGGCAAGCGGCACCTCAAGTGTTCCCCGCGCCAGCGGGGATAAACCGCGTCAGCGCGGTATTGAGGCCGGGGAC
CGCCCGTGTTCCCCGCGCCAGCGGGGATAAACCGAACAGGAACAGGAAAAAAAAGATTTGTCCGGTGTGTTCCCCGCGCC
AGCGGGGATAAACCGCAGATCCTCAACGGTCAGGCTGTTTAGTTCCTGTGTTCCCCGCGCCAGCGGGGATAAACCGCGGA
GGATGGAATATTTCCGAGGCTGGCGATTGTGTTCCCCGCGCTAGCGGGGATAAACCGATGCCGGAACGCTGATGGCGTTT
GACATGAGCGTGTTCCCCGCGCCAGCGGGGATAAACCGAATTATTTCTGTGGCTGGGGTTTCGATTCGATGTGTTCCCCG
CGCCAGCGGGGATAAACCGTGACGCTGGTCTATACCGGCAACGAACGCGACGTGTTCCCCGCGCCAGCGGGGATAAACCG
TTGACGGTGACGTCAGTGCCGAAGGCGAAATAGTGTTCCCCGCGCCAGCGGGGATAAACCGCCAGCTTACGCTATTTACG
ACGTTATTGAGCAGTGTTCCCCGCGCCAGCAGGGATAAATCGAAACGAAAGAGGCTATGCGGTTGTTTATCGGTGTGTTC
CCCGCGCCAGCGGGGATAAACCGCCCCGATAGCGACGCTTCTGTAGTCACTGGCAGTGTTCCCCGCGCCAGCGGGGATAA
ACCGGTGAGTTCGGTTTTAATTTCGTCGCTAAGCTGCGTGTTCCCCGCGCCAGCGGGGATAAGCCGCGTCACTTTCTGAC
ATTTTATTCAGTTCGTTAGTGTTCCCCGTGCCAGCGGGGATAAACCGTCATTTCTGGACGGGGCTGTGTGACGAATACGG
TGTTCCCCGCGCCAGCGGGGATAAACCGTGTCCAATTAACCCAAACTTTGCGCGCTTAATATGTTCCCCGCGCTAGCGGG
GATAAACCGGGATATGTGAAGTTCAGGTAGCCCATTACGCAGTGTTCCCCGCGCCAGCGGGGATAAACCGTTGATCGAGA
GTGCGAAGAGGCAGAACGGGCAGTGTTCCCCGCGCCAGCGGGGATAAACCGCAGGTTATGCGCAAAAATTAATTCATATT
ATAGTGTTCCCCGCGCCAGCAGGGATAAACCGGACGAGTTCTGGAAATGGTTAGCTGATAAAGAGTGTTCCCCGCGCCAG
CGGGGATAAACCGCGTTCATCGGCAGCGTCACGCAATATGAAGATGTGTTCCCCGCGCCAACAAGGATAGCCGTTGCATA
ATCATAATCTGTGTACCAGTAATGGCAGCTACAAACCTGTAAAGTAAAAAGGCCGCGTTTTCCCGGGGAGGCTTTTAGAC
AGGAGAAGGCCATG
DR Consensus			GTGTTCCCCGCGCCAGCGGGGATAAACCG
DR Length			29
Spacers Count			24
Direction			+
Potential Orientation (AT%)			+
Evidence Level			4
Conservation DR			0.8844
Conservation Spacer			0
Spacer
>spacer1
TTTTGATACGTAGTATTCATTACGCCTCCTAG
>spacer2
GCGAGGTCAATAAAAAATGGTGTGGCTTTACC
>spacer3
CCGGCATCAGCGCCGATCCGTTCATAGTGCCC
>spacer4
AAAAAACAGAAGAACGGCAAGCGGCACCTCAA
>spacer5
CGTCAGCGCGGTATTGAGGCCGGGGACCGCCC
>spacer6
AACAGGAACAGGAAAAAAAAGATTTGTCCGGT
>spacer7
CAGATCCTCAACGGTCAGGCTGTTTAGTTCCT
>spacer8
CGGAGGATGGAATATTTCCGAGGCTGGCGATT
>spacer9
ATGCCGGAACGCTGATGGCGTTTGACATGAGC
>spacer10
AATTATTTCTGTGGCTGGGGTTTCGATTCGAT
>spacer11
TGACGCTGGTCTATACCGGCAACGAACGCGAC
>spacer12
TTGACGGTGACGTCAGTGCCGAAGGCGAAATA
>spacer13
CCAGCTTACGCTATTTACGACGTTATTGAGCA
>spacer14
AAACGAAAGAGGCTATGCGGTTGTTTATCGGT
>spacer15
CCCCGATAGCGACGCTTCTGTAGTCACTGGCA
>spacer16
GTGAGTTCGGTTTTAATTTCGTCGCTAAGCTGC
>spacer17
CGTCACTTTCTGACATTTTATTCAGTTCGTTA
>spacer18
TCATTTCTGGACGGGGCTGTGTGACGAATACG
>spacer19
TGTCCAATTAACCCAAACTTTGCGCGCTTAAT
>spacer20
GGATATGTGAAGTTCAGGTAGCCCATTACGCA
>spacer21
TTGATCGAGAGTGCGAAGAGGCAGAACGGGCA
>spacer22
CAGGTTATGCGCAAAAATTAATTCATATTATA
>spacer23
GACGAGTTCTGGAAATGGTTAGCTGATAAAGA
>spacer24
CGTTCATCGGCAGCGTCACGCAATATGAAGAT
